# Supplementary material for: 0D-1D Hybrid Silicon Nanocomposite as Lithium-Ion Batteries Anodes
Source: MDPI journal article supplement (doi:10.3390/nano10030515), 2020-03-12
Supplement: s1 [file s1]

## Supplementary Materials: 0D-1D Hybrid Silicon Nanocomposite as Lithium-Ion Batteries anodes

Sergio Pinilla <sup>1,2,t</sup> , Sang-Hoon Park <sup>2</sup>, Kenneth Fontanez <sup>3</sup>, Francisco Márquez <sup>3</sup>, Valeria Nicolosi <sup>2\*</sup> and Carmen Morant <sup>1\*</sup>

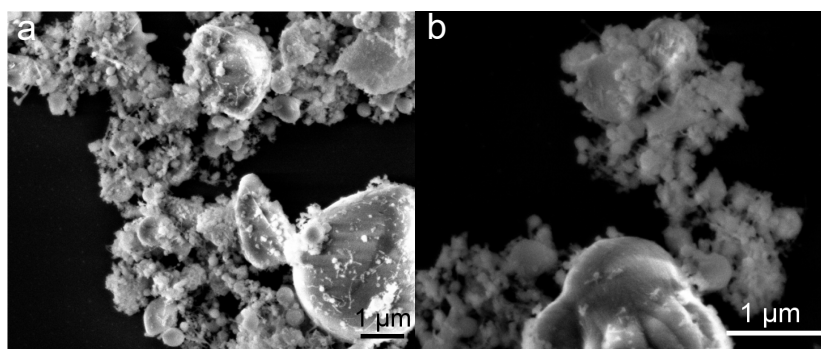

**Figure S1.** SEM images of SiNWs/SiNPs-US nanomaterial. Different areas are displayed, a) and b), showing non homogeneous particle size.

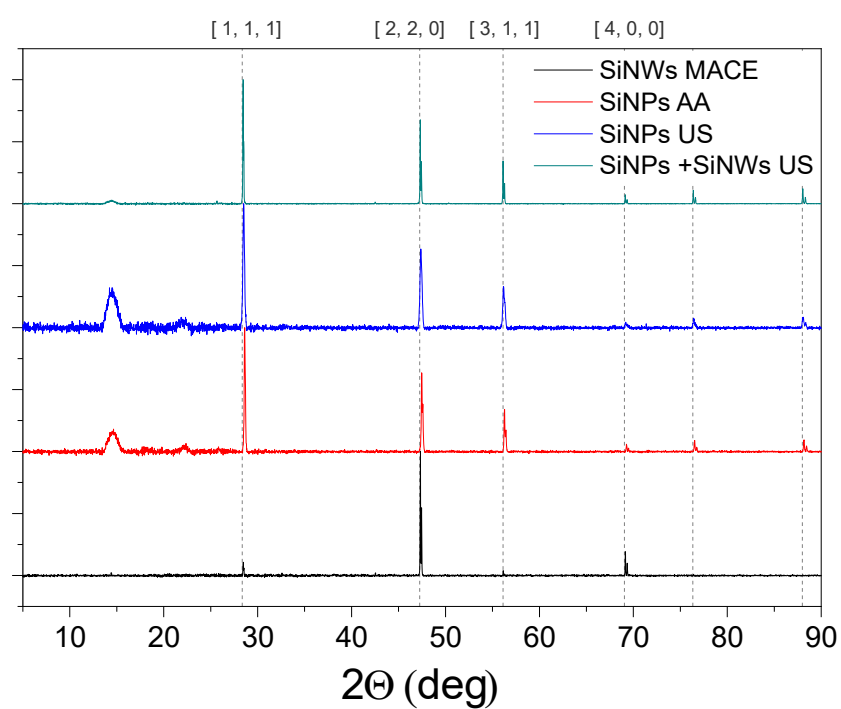

**Figure S2.** XRD patterns of the four studied Si nanomaterials. The dashed lines indicates Si peak positions of different crystalline orientations.
